# Supplementary material for: The reporting of methods for reducing and detecting bias: an example from the WHO Misoprostol Third Stage of Labour equivalence randomised controlled trial
Source: Springer Nature journal article supplement (doi:10.1186/1471-2288-3-19), 2003-10-03
Supplement: Additional file 1 [file 1471-2288-3-19-S1.doc]

**Appendix: SAS® program to allocate subjects to two treatments in blocks of randomly varying sizes of 4 and 6**

/* Macro to perform Block Randomization */

%macro randblk(trial,centre,ngroups,block);

/*--------------------------------------------------- */

/* Trial : Trial number */

/* Centre : Centre number -> Seed is Trial * Centre */

/* ngroups: is the number of groups for randomization */

/* Block : the size of the block size */

/*--------------------------------------------------- */

/* block to hold treatment groups in calling program */

/* array blk (*) blk01-blknn; */

/*--------------------------------------------------- */

rgrp = 1;

pos = 1;

rseed = &trial*&centre;

/*--------------------------------------------------------*/

/* Initialize block with equal number of treatment groups */

/*--------------------------------------------------------*/

do pos = 1 to &block;

blk(pos) = rgrp;

if rgrp = &ngroups then rgrp = 1;

else rgrp = rgrp + 1;

end;

/*-------------------------------------------------------*/

/* Pseudo-random permutation of treatment groups */

/*-------------------------------------------------------*/

do ri = 1 to &block;

rperm = min(int(&block*ranuni(rseed))+1,&block);

rtemp = blk(ri);

blk(ri) = blk(rperm);

blk(rperm) = rtemp;

end;

%mend randblk;

Proc format;

value grand 1 = 'Misoprostol 600mg' 2 = 'Control';

Title1 'Project 97901 - Misoprostol Trial';

Title2 'Allocation of subjects in blocks of sizes 4 and 6, centre X';

Data Rand;

array blk (*) blk1-blk6;

array blksize (*) bls1 bls2;

bls1 = 4; /* block size randomly changed from 4 to 6 */

bls2 = 6;

trial = 97901; /* Trial Number */

centre = 0896; /* Centre X */

from_sub = 1;

to_sub = 700;

keep trial centre subj chk groupn;

soffset = 0;

do while (soffset < to_sub);

rsize = min(int(2*ranuni(rseed))+1,2);

%randblk(trial,centre,2,blksize(rsize));

subj = soffset;

do si = 1 to blksize(rsize) while (subj < to_sub);

subj = soffset + si;

groupn = blk(si);

output;

end;

soffset = soffset + blksize(rsize);

end;

stop;
